# Supplementary material for: Empirical Decomposition and Forecast of Carbon Neutrality for High-End Equipment Manufacturing Industries
Source: Frontiers journal article supplement (doi:10.3389/fenvs.2022.926365), 2022-06-21
Supplement: Table_1.XLSX [file Table_1.XLSX]

## Sheet: CB_DATA_
Crystal Ball Data
															0
Workbook Variables	Last Var Column	0
Name:
Value:
Worksheet Data	Last Data Column Used
	2
Sheet Ref
#REF!	#REF!
Sheet Guid
80ac2b01-1c79-4ba4-9e58-3322a42f4b3c	667f01ed-8c83-4e3a-8f60-dfd5059d6226
Deleted sheet count
Last row used
28	26
Data blocks
CB_Block_0
㜸〱敤㕣㕢㙣ㅣ㔷ㄹ摥ㄹ敦慥㜷搶㜶散挶改㈵改捤扤㕦ㅣ㙤攳㕣攸㡤㤰昸㤲㕢敢㈴㑥散愴㔴㙤搹㡥㜷捦搸㤳散捣扡㌳戳㑥㕣ち愴㔰㕡㑡㐱愸攵〱㕡ち㡤㉡㔴挱ぢ㔲㤱愸㕡㐸ㅦ㤰㐰㈰搴㈲ㅥ㉡㈴ㅥ㤰㑡〵㐵〸㠴㈲㔵㐸㤵愸㔴扥敦捣捣敥散慥㜷散㙣㕢㜰㤱㈷搹㍦㘷捥晤㥣晦㝡晥晦㑣ㄲ㑡㈲㤱㜸ㅦて晦攵㤳㘴攲㤲挹〵搷ㄳ㔶㙥戴㕣㉡㠹㠲㘷㤶㙤㌷㌷散㌸晡挲戸改㝡ㅤ愸㤰捥㥢㈸㜷㔳㜹搷㝣㔰㘴昲昳挲㜱㔱㈹㤵㐸㘴㌲㥡㡡㜲㜶挲㕦㕦昸愲戱㔵㜷ㄲ㘰㙡㜴攴攰昴㌱昴㍡改㤵ㅤ戱㜱攰愸摦㜶晢搰㔰㙥㈸户㜵换收㉤戹㑤ㅢ〷㐶㉢㈵慦攲㠸敤戶愸㜸㡥㕥摡㌸㌰㔱㤹㉥㤹㠵㍢挵挲㔴昹戸戰户㡢改㑤㕢愶昵慤户っ㙤摤戶捤戸昵搶㕢扡㌱㜴攲挰攸挸㠴㈳っ昷㐳敡㌳挵㈹㙦ㅤㄳ〵㤳㙢ㄳ挲㌱敤㤹摣攸〸晥㐶收㡦户㥢㜳㤳戳㐲㜸ㅣ㕡㌸挲㉥〸㔷㐳挳㉥㙢搸㜵㉢搶ㅣ㌷㑦戳㜶㘳愹〵摤昵㔲搶愸㈸㤵㌴㉢散㌵㘳ㅤ挴摥㤵昴㠵㙥㙢㔲搸慥改㤹昳愶户㤰戶愶搰㔱戱挷㍡攲㡡挳扡㍤㈳づ攸㤶㐸㔹㝢㉡㘶㌱改㍦㠹㡥敢挲㉥愲ㄳ㤳换捦つ…
Decisioneering:7.0.0.0

## Sheet: Sheet1
省份	年份	高端装备制造业生产总值（亿元）	GDP	规模以上工业企业生产总值	占工业企业营业收入比重	能源强度	能源消费总量（万吨标准煤）	低位发热量	碳排放系数	二氧化碳与碳质量比	二氧化碳排放量	碳排放增长率	高端装备制造业利润总额	高端装备制造业增长率	技术创新（专利申请数）
北京	2013	8572.56	21134.6	18688.6	0.458705	28.4415	301.41	29307.6	25.8	3.667	835.735	-0.02206	630.82	0.178831	19210
北京	2014	9392.75	22926	19776.7	0.474941	32.4167	289.75	29307.6	25.8	3.667	803.405	-0.04024	680.28	0.0727054	19916
北京	2015	9381.55	24779.1	18864.9	0.497302	33.0966	283.46	29307.6	25.8	3.667	785.964	-0.02219	636.14	-0.0693872	20024
北京	2016	10359.1	27041.2	19747	0.524592	35.2338	294.01	29307.6	25.8	3.667	815.217	0.035883	725.55	0.123231	20065
北京	2017	10405.5	29883	20722	0.502144	36.0225	288.86	29307.6	25.8	3.667	800.937	-0.01783	856	0.152395	19653
北京	2018	10556.7	33106	21435.7	0.492484	39.6795	266.05	29307.6	25.8	3.667	737.69	-0.08574	777.15	-0.10146	20655
北京	2019	11161.4	35445.1	22348.1	0.499436	44.475	250.96	29307.6	25.8	3.667	695.85	-0.06013	839.17	0.0739064	22552
天津	2013	8713.41	9945.4	27078.4	0.321784	79.2498	109.949	29307.6	25.8	3.667	304.861	-0.05672	623.46	0.147195	16302
天津	2014	8907.02	10640.6	28382.6	0.31382	102.335	87.0379	29307.6	25.8	3.667	241.334	-0.263229	618.77	-0.00757955	16832
天津	2015	9425.14	10879.5	27969.6	0.336978	134.585	70.0312	29307.6	25.8	3.667	194.179	-0.242844	709.33	0.12767	16721
天津	2016	9100.03	11477.2	25888.2	0.351512	187.372	48.5667	29307.6	25.8	3.667	134.663	-0.441959	636.33	-0.11472	17170
天津	2017	5870.5	12450.6	16144.1	0.363632	555.266	10.5724	29307.6	25.8	3.667	29.3147	-3.59372	310.12	-1.05188	15770
天津	2018	6403.01	13362.9	17549.7	0.36485	630.751	10.1514	29307.6	25.8	3.667	28.1473	-0.0414735	319.77	0.0301779	15051
天津	2019	6825.62	14055.5	16565.5	0.412038	689.566	9.89843	29307.6	25.8	3.667	27.4459	-0.0255572	322.37	0.00806527	15634
河北	2013	6930.79	24259.6	46340.9	0.149561	20.4611	338.73	29307.6	25.8	3.667	939.214	0.020105	513.8	0.10724	9171
河北	2014	7733.5	25208.9	47207.8	0.163818	22.9256	337.33	29307.6	25.8	3.667	935.332	-0.00415	532.3	0.0347548	9929
河北	2015	8212.02	26398.4	45648.1	0.179898	25.7915	318.4	29307.6	25.8	3.667	882.844	-0.05945	608.88	0.125772	10396
河北	2016	9011.79	28474.1	47318.6	0.190449	27.5144	327.53	29307.6	25.8	3.667	908.159	0.027875	705.28	0.136683	13189
河北	2017	7673.49	30640.8	41950	0.18292	24.2609	316.29	29307.6	25.8	3.667	876.993	-0.03554	461.3	-0.528897	13855
河北	2018	6359.45	32494.6	37835.5	0.168082	21.0265	302.45	29307.6	25.8	3.667	838.619	-0.04576	301.84	-0.528293	16707
河北	2019	6845.23	34978.6	32654.8	0.209624	23.9612	285.68	29307.6	25.8	3.667	792.12	-0.0587	318.46	0.0521887	21570
辽宁	2013	13935.4	19208.8	51533.4	0.270415	20.8813	667.363	29307.6	25.8	3.667	1850.43	0.083284	882.98	0.0783596	11628
辽宁	2014	13552.9	20025.7	48801.6	0.277715	52.4466	258.414	29307.6	25.8	3.667	716.516	-1.58254	849.88	-0.0389467	12098
辽宁	2015	9651.11	20210.3	33243.3	0.290318	43.8962	219.862	29307.6	25.8	3.667	609.623	-0.17534	486.53	-0.746819	9190
辽宁	2016	6877.15	20392.5	22039	0.312045	44.4861	154.591	29307.6	25.8	3.667	428.642	-0.42222	340.27	-0.429835	9709
辽宁	2017	6549.09	21693	23476.4	0.278965	67.9066	96.4426	29307.6	25.8	3.667	267.411	-0.60293	439.82	0.226343	11206
辽宁	2018	6331.4	23510.5	26489.9	0.239012	117.92	53.6925	29307.6	25.8	3.667	148.876	-0.7962	523.53	0.159895	12485
辽宁	2019	7423.4	24855.3	22351.5	0.332121	188.746	39.3301	29307.6	25.8	3.667	109.053	-0.36517	576.43	0.0917718	13783
山东	2013	29068.7	47344.3	132130	0.22	17.7736	1635.5	29307.6	25.8	3.667	4534.83	0.039009		0.107496	40030
山东	2014	34210.5	50774.8	143140	0.239	21.9919	1555.6	29307.6	25.8	3.667	4313.29	-0.05136		0.117837	44466
山东	2015	34805.3	55288.8	145629	0.239	23.3985	1487.5	29307.6	25.8	3.667	4124.47	-0.04578		0.128479	42289
山东	2016	38112.2	58762.5	150641	0.253	30.6936	1241.7	29307.6	25.8	3.667	3442.92	-0.19795		0.0681438	45921
山东	2017	34932.5	63012.1	140857	0.248	32.7912	1065.3	29307.6	25.8	3.667	2953.81	-0.16559		0.133526	55881
山东	2018	19745.9	66648.9	92703.6	0.213	20.2418	975.5	29307.6	25.8	3.667	2704.82	-0.09206		0.074	60928
山东	2019	17464.1	70540.5	83162.3	0.21	19.5523	893.2	29307.6	25.8	3.667	2476.62	-0.09214		0.036	57339
